# Supplementary material for: Determinants of Brain Cell Metabolic Phenotypes and Energy Substrate Utilization Unraveled with a Modeling Approach
Source: PLoS Comput Biol. 2012 Sep 13;8(9):e1002686. doi: 10.1371/journal.pcbi.1002686 (PMC3441424; doi:10.1371/journal.pcbi.1002686)
Supplement: Table S1 — Parameters used in our simulations to compute the basal state of a typical oxidative cell (cf. Fig. 2A). For the references, refer to the bibliography in Text S1. (DOC) [file pcbi.1002686.s006.doc]

| **MCT transport** | **LDH metabolism** | **PDH metabolism** | **Glycolysis** | **Mitoch. shuttle** |
| --- | --- | --- | --- | --- |
| vmax,MCT = 0.29mM/s | vmax,LDHforward = 469mM/s | kcat = 0.077/s | vmax,glyco = 0.041mM/s | kshuttle = 300/s |
| Le = 1.2mM | vmax,LDHreverse = 2035 mM/s | PDHtot = 0.9mM | Glc = 1mM |  |
| Hi = 10-4.0mM | Kia = 0.154mM | vmax,PDH = kcat PDHtot | KGlc,glyco = 0.05mM |  |
| He = 10-4.3mM | Kiq = 0.001mM | KP,PDH = 0.01mM | KNAD+,glyco = 0.03mM |  |
| KHie = 0.7 He | KmA = 0.000014mM |  |  |  |
|  | KmQ = 0.0018mM |  |  |  |
|  | Kib = 3892mM |  |  |  |
|  | Kip = 0.0625mM |  |  |  |
|  | KmB = 1.28mM |  |  |  |
|  | KmP = 0.093mM |  |  |  |

For the references, refer to the bibliography in Text S1.
